# Supplementary material for: The maximum limiting performance improved counter electrode based on a porous fluorine doped tin oxide conductive framework for dye-sensitized solar cells
Source: Royal Society of Chemistry journal article supplement (doi:10.1039/c3nr33338h), 2013-01-01
Supplement: c3nr33338h.pdf [file c3nr33338h.pdf]

# Supplementary Information

## The Maximum Limiting Performance Improved Counter Electrode based on Porous Fluorine Doped Tin Oxide Conductive Framework for Dye-sensitized Solar Cells

Chunxiong Bao<sup>ab</sup>, Huan Huang<sup>ab</sup>, Jie Yang<sup>ab</sup>, Hao Gao<sup>ab</sup>, Tao Yu<sup>\*ab</sup>, Jianguo Liu<sup>ac</sup>, Yong Zhou<sup>ab</sup>, Zhaosheng Li<sup>ac</sup> and Zhigang Zou<sup>ab</sup>

<sup>a</sup>National Laboratory of Solid State Microstructures, Nanjing University, Nanjing 210093, P. R. China.

E-mail: yutao@nju.edu.cn

<sup>b</sup>Eco-Materials and Renewable Energy Research Center (ERERC), Department of Physics, Nanjing University, Nanjing 210093, P. R. China.

<sup>c</sup>Department of Materials Science and Engineering, Nanjing University, Nanjing, 210093, P. R. China

**Table S1** Summary of characterization data obtained by adsorption-desorption of N<sub>2</sub>, the pore radius, pore volume, and specific surface area of PFTO, PFTO-Pt and PFTO-C.

|                                                                        | PFTO  | PFTO-Pt | PFTO-C |
|------------------------------------------------------------------------|-------|---------|--------|
| BET Surface Area (m <sup>2</sup> /g)                                   | 42.54 | 43.86   | 75.33  |
| Langmuir Surface Area(m <sup>2</sup> /g)                               | 59.36 | 62.17   | 102.21 |
| Single point adsorption total pore volume of pores (m <sup>3</sup> /g) | 0.26  | 0.21    | 0.21   |
| BJH Adsorption cumulative volume of pores (m <sup>3</sup> /g)          | 0.29  | 0.26    | 0.24   |
| BJH Desorption cumulative volume of pores (m <sup>3</sup> /g)          | 0.29  | 0.26    | 0.24   |
| Adsorption average pore width(nm)                                      | 24.44 | 18.88   | 11.21  |
| BJH Adsorption average pore diameter (nm)                              | 22.47 | 19.33   | 21.81  |
| BJH Desorption average pore diameter (nm)                              | 20.80 | 17.80   | 20.76  |

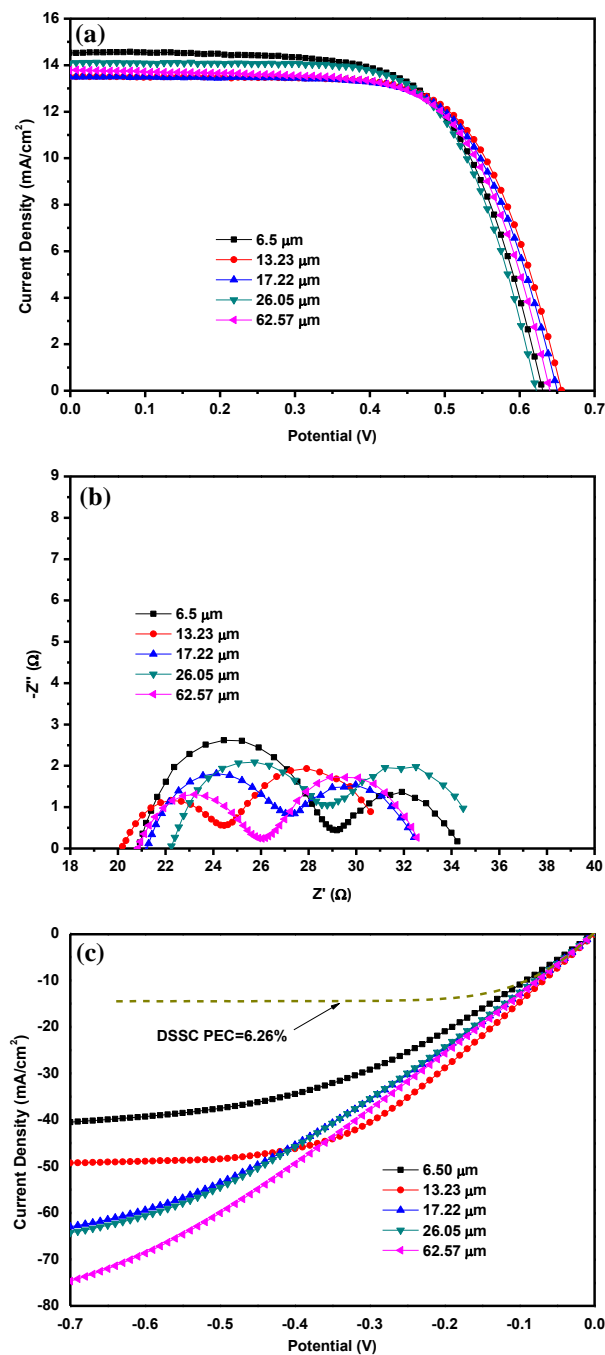

**Fig. S1** Photovoltaic and electrochemical performance of Pt modified PFTO CE with different thickness. (a) J-V curves of DSSCs based on PFTO-Pt CE with different thickness. (b) Nyquist plots of symmetrical cells of PFTO-Pt CE with different thickness. (c) Polarization curves of symmetrical cells of PFTO-Pt CE with different thickness

**Table S2** Photovoltaic performance of DSSCs with Pt modified PFTO CE with different thickness and the electrochemical parameters of the corresponding symmetrical cells.

| CE thickness<br>(μm) | Voc (V) | Jsc (mA/cm <sup>2</sup> ) | FF (%) | PCE (%) | R <sub>s</sub><br>(Ω cm <sup>2</sup> ) | R <sub>CT</sub><br>(Ω cm <sup>2</sup> ) | R <sub>s</sub> +R <sub>CT</sub><br>(Ω cm <sup>2</sup> ) | R <sub>s</sub> +R <sub>CT</sub> *<br>(Ω cm <sup>2</sup> ) | PCE <sub>lim</sub><br>(%) |
|----------------------|---------|---------------------------|--------|---------|----------------------------------------|-----------------------------------------|---------------------------------------------------------|-----------------------------------------------------------|---------------------------|
| 6.5 μm               | 0.63    | 14.54                     | 65.74  | 6.03    | 2.61                                   | 1.01                                    | 3.62                                                    | 4.80                                                      | 14.58                     |
| 13.23 μm             | 0.66    | 13.51                     | 68.65  | 6.09    | 2.52                                   | 0.48                                    | 3.00                                                    | 3.47                                                      | 20.25                     |
| 17.22 μm             | 0.65    | 13.50                     | 68.53  | 6.02    | 2.65                                   | 0.76                                    | 3.41                                                    | 4.08                                                      | 18.28                     |
| 26.05 μm             | 0.62    | 14.23                     | 67.82  | 6.01    | 2.78                                   | 0.84                                    | 3.62                                                    | 4.15                                                      | 18.37                     |
| 62.57 μm             | 0.64    | 13.78                     | 67.58  | 5.96    | 2.61                                   | 0.63                                    | 3.24                                                    | 3.91                                                      | 19.80                     |

\* This column was obtained from polarization curves of symmetrical cells of CE.

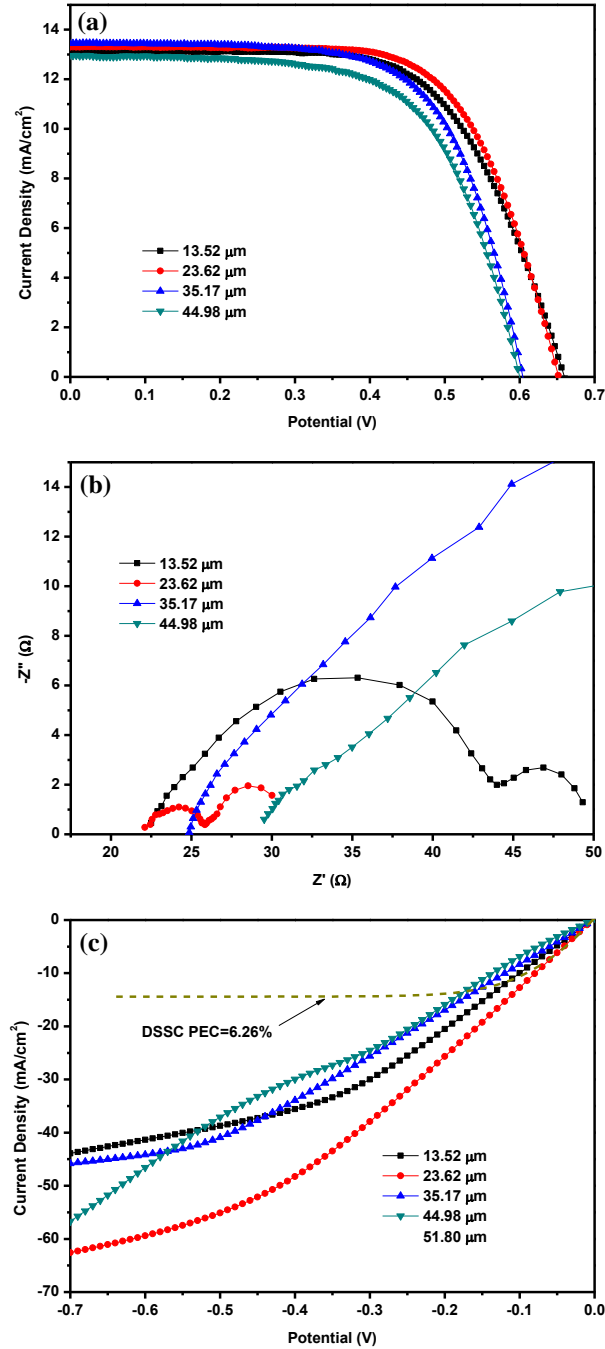

**Fig. S2** Photovoltaic and electrochemical performance of C modified PFTO CEs with different thickness. (a) J-V curves of DSSCs based on PFTO-C CEs with different thickness. (b) Nyquist plots of symmetrical cells of PFTO-C CEs with different thickness. (c) Polarization curves of symmetrical cells of PFTO-C CEs with different thickness

**Table S3** Photovoltaic performance of DSSCs with C modified PFTO CEs with different thickness and the electrochemical parameters of the corresponding symmetrical cells.

| CE thickne<br>(μm) | Voc<br>(V) | Jsc<br>(mA/cm <sup>2</sup> ) | FF (%) | PCE (%) | R <sub>S</sub><br>(Ω cm <sup>2</sup> ) | R <sub>CT</sub><br>(Ω cm <sup>2</sup> ) | R <sub>S</sub> +R <sub>CT</sub><br>(Ω cm <sup>2</sup> ) | R <sub>S</sub> +R <sub>CT</sub> *<br>(Ω cm <sup>2</sup> ) | PCE <sub>lim</sub><br>(%) |
|--------------------|------------|------------------------------|--------|---------|----------------------------------------|-----------------------------------------|---------------------------------------------------------|-----------------------------------------------------------|---------------------------|
| 13.52              | 0.66       | 13.15                        | 64.12  | 5.56    | 2.79                                   | 2.65                                    | 5.44                                                    | 3.96                                                      | 15.12                     |
| 23.62              | 0.65       | 13.29                        | 67.03  | 5.81    | 2.75                                   | 0.51                                    | 3.26                                                    | 3.93                                                      | 19.58                     |
| 35.17              | 0.60       | 13.45                        | 66.16  | 5.38    | 3.10                                   | 1.05                                    | 4.15                                                    | 4.73                                                      | --                        |
| 44.98              | 0.60       | 12.94                        | 64.28  | 4.99    | 3.61                                   | 0.82                                    | 4.43                                                    | 5.15                                                      | --                        |

\* This column was obtained from polarization curves of symmetrical cells of CEs.
